# Supplementary material for: Three-dimensional map of nonhematopoietic bone and bone-marrow cells and molecules
Source: Springer Nature journal article supplement (doi:10.1038/nbt.4006), 2017-11-13
Supplement: 41587_2017_BFnbt4006_MOESM20_ESM.pdf [file 41587_2017_BFnbt4006_MOESM20_ESM.pdf]

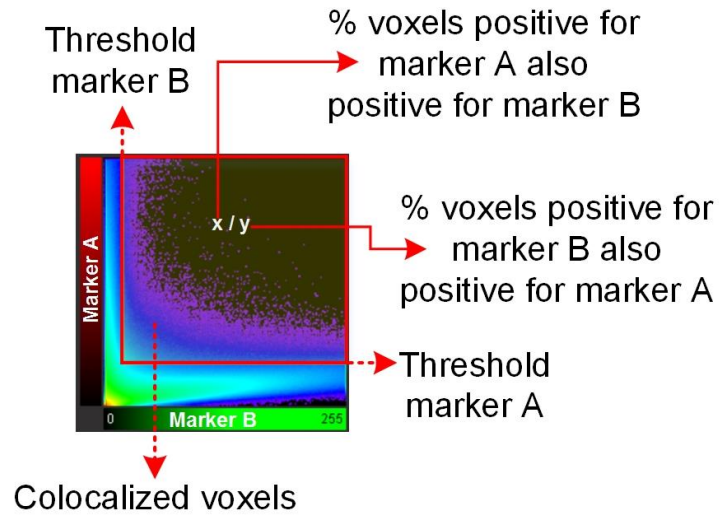

### Supplementary Figure 1

#### Display of colocalization analysis results.

The Coloc module of Imaris was used for voxel colocalization analyses. The software tools were used to select thresholds for two given markers (marker A and B here), which are indicated by the red box. The value given by x represents the percentage of voxels with a fluorescence intensity for marker A above the threshold that also have a fluorescence intensity for marker B above threshold. Inversely, the value given by y represents the percentage of voxels with a fluorescence intensity for marker B above the threshold that also have a fluorescence intensity for marker A above threshold. The colocalization data presented is derived from the full or partial image (see figure legends for details) shown in the same figure panel.

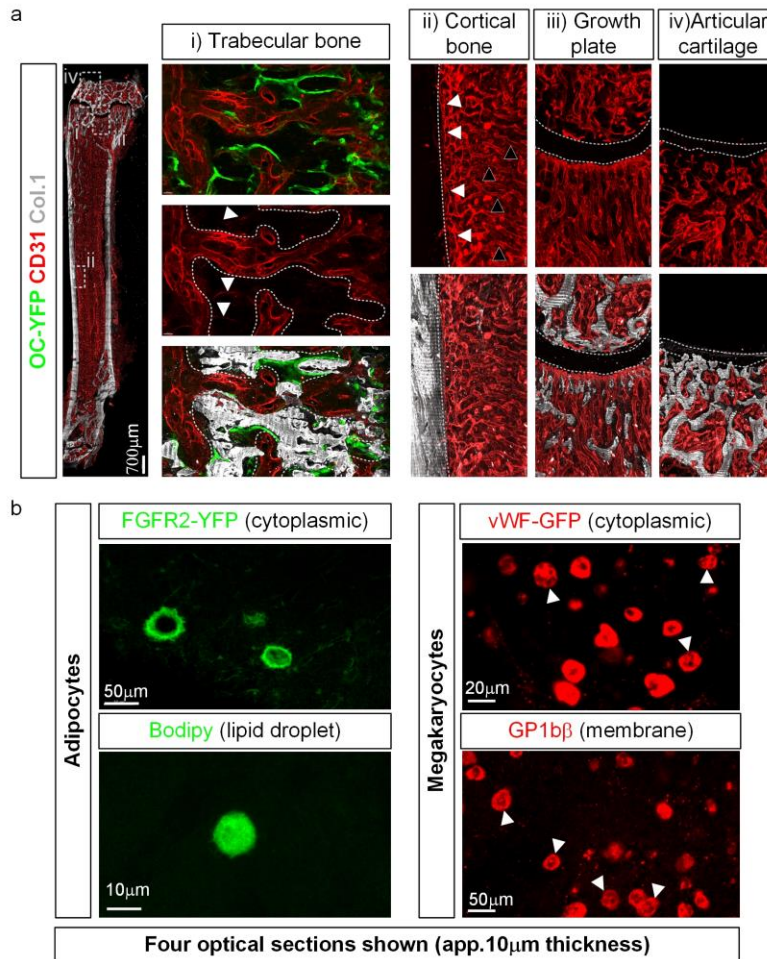

**Supplementary Figure 2**

Identification of distinct anatomical locations and cell types in adult mouse femurs without landmark staining.

a) Examples showing how to identify trabecular (i) and cortical (ii) bone surfaces, as well as growth plate (iii) and articular (iv) cartilage using only a vascular marker (collagen 1 is here shown to validate proper identification). i) Trabecular bone in the metaphyseal area can be identified by the complete absence of vascular sinusoids (dotted lines) although it can be irrigated by rare arterioles or capillaries (arrowheads). ii) Similarly, cortical bone shows a complete absence of sinusoids but is traversed by some arterioles (not shown). At the bone surface (dotted line), vasculature consists of capillaries running parallel to the long axis of the bone (arrowheads), as opposed to the central marrow where mainly sinusoids are present and radiate axially from the center of the marrow cavity. iii, iv) Growth plate and articular cartilage show a complete absence of vasculature and are located in very specific anatomical locations. b) Adipocytes and megakaryocytes can be difficult to distinguish by inexperienced researchers without specific staining. However, adipocytes are typically bigger and rounder than megakaryocytes. Also, a cytoplasmic staining in adipocytes clearly shows a lack of staining in the large lipid droplet (upper left) whereas a lipid droplet staining shows a smaller spherical staining (lower left). Cytoplasmic (upper right) or membrane (lower right) stainings in megakaryocytes shows cells with irregular shapes, in many of which we can observe multiple/complex nuclei (arrowheads).

Nes-GFP CD31 ALP

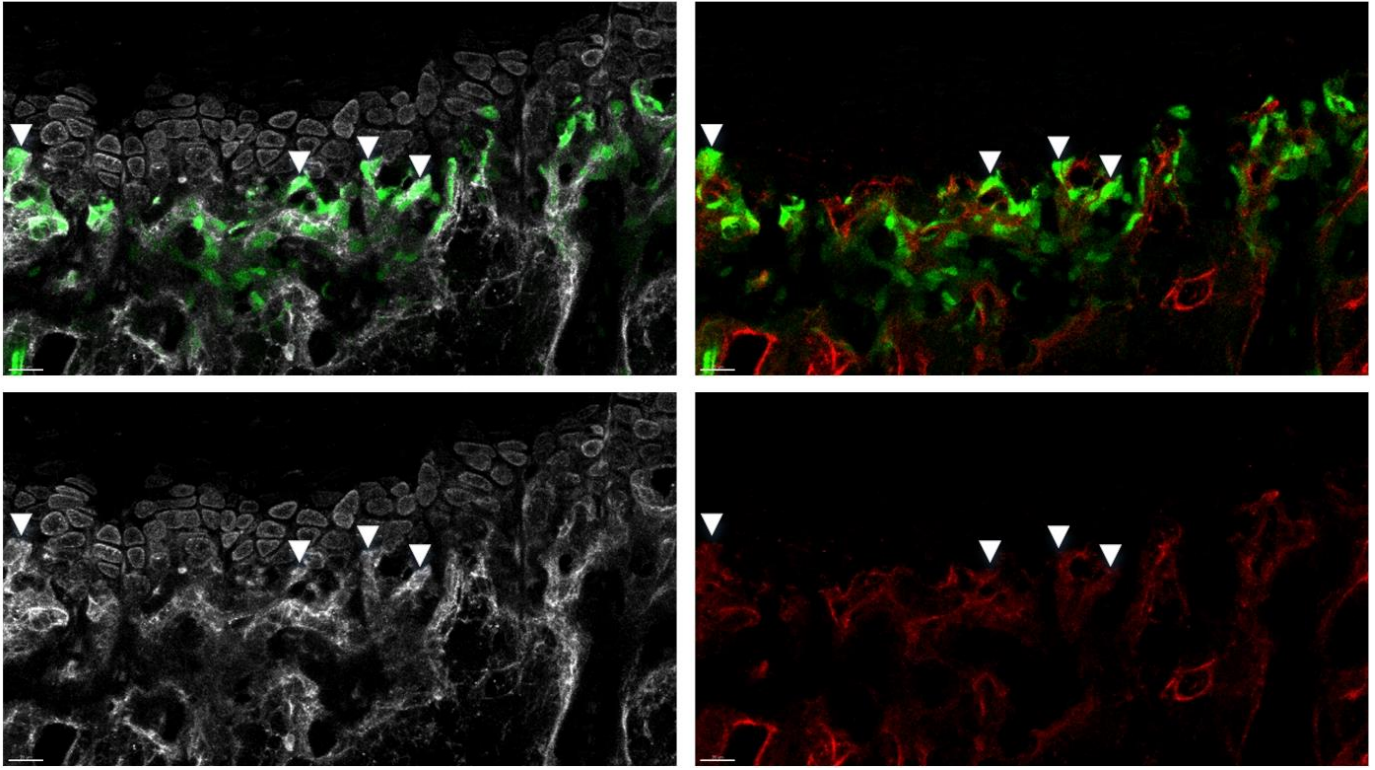

Supplementary Figure 3

Some Nes-GFP-expressing cells are ALP<sup>+</sup>CD31<sup>-</sup> osteoblastic cells.

Images show a zoom of data presented in Figure 2b and only four optical sections (total thickness 9.96 $\mu$ m). Near the distal growth plate of the femur, Nes-GFP expressing cells (green, white arrowheads) are closely associated with CD31<sup>+</sup> blood vessels (red), but are osteoblastic cells expressing ALP (grey). Scale bars: 20 $\mu$ m



**Osx-CreERT (tdTomato) Sca1 osteocalcin**

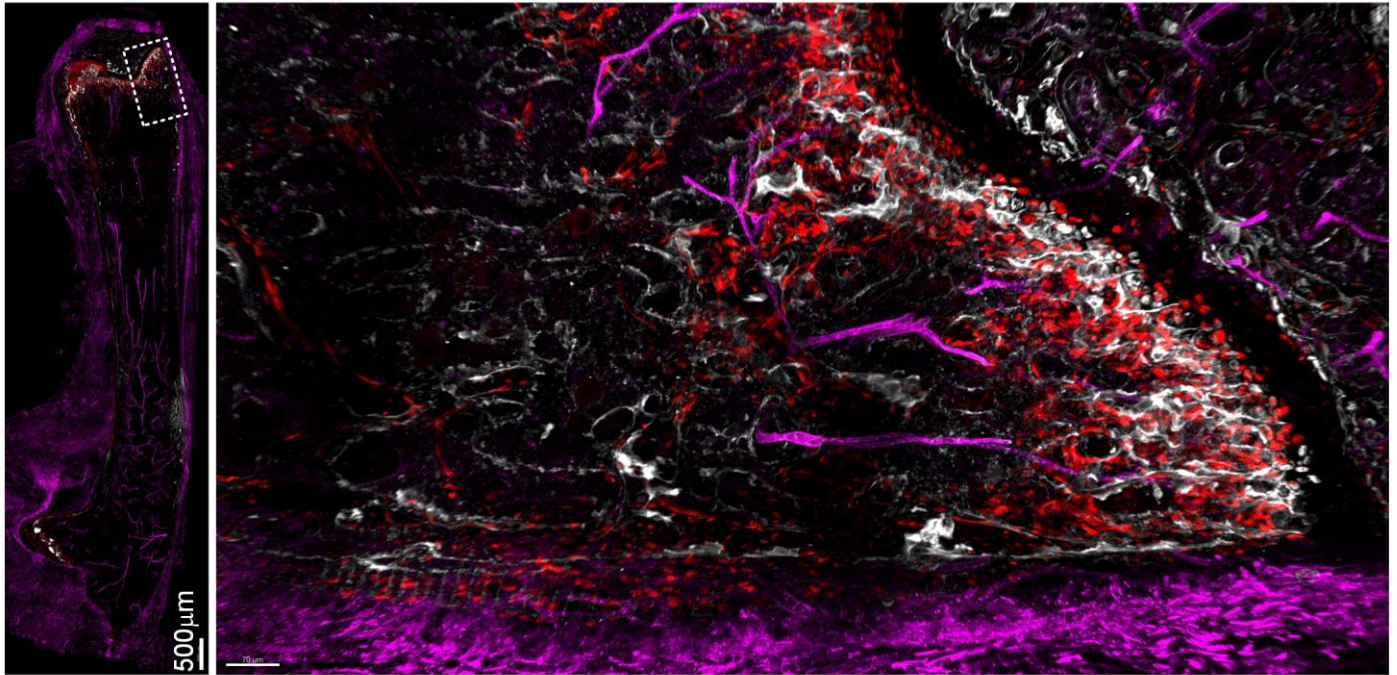

**7 weeks old female, 3 days post-4OHT (2mg i.p.)**

**Supplementary Figure 4**

Osx-CreERT (tdTomato) reporter shows a similar expression pattern to that of the Osx-GFP reporter.

7 weeks old female Osx-CreERT mice received 2mg 4-hydroxytamoxifen intraperitoneally and femurs were harvested three days later. Expression of the tdTomato reporter at day 3 post-4OHT recapitulates that of the Osx-GFP reporter (see figure 2c). Scale bar of detail 70μm.

OC-YFP CD105 OC<sub>(antibody)</sub> col.1

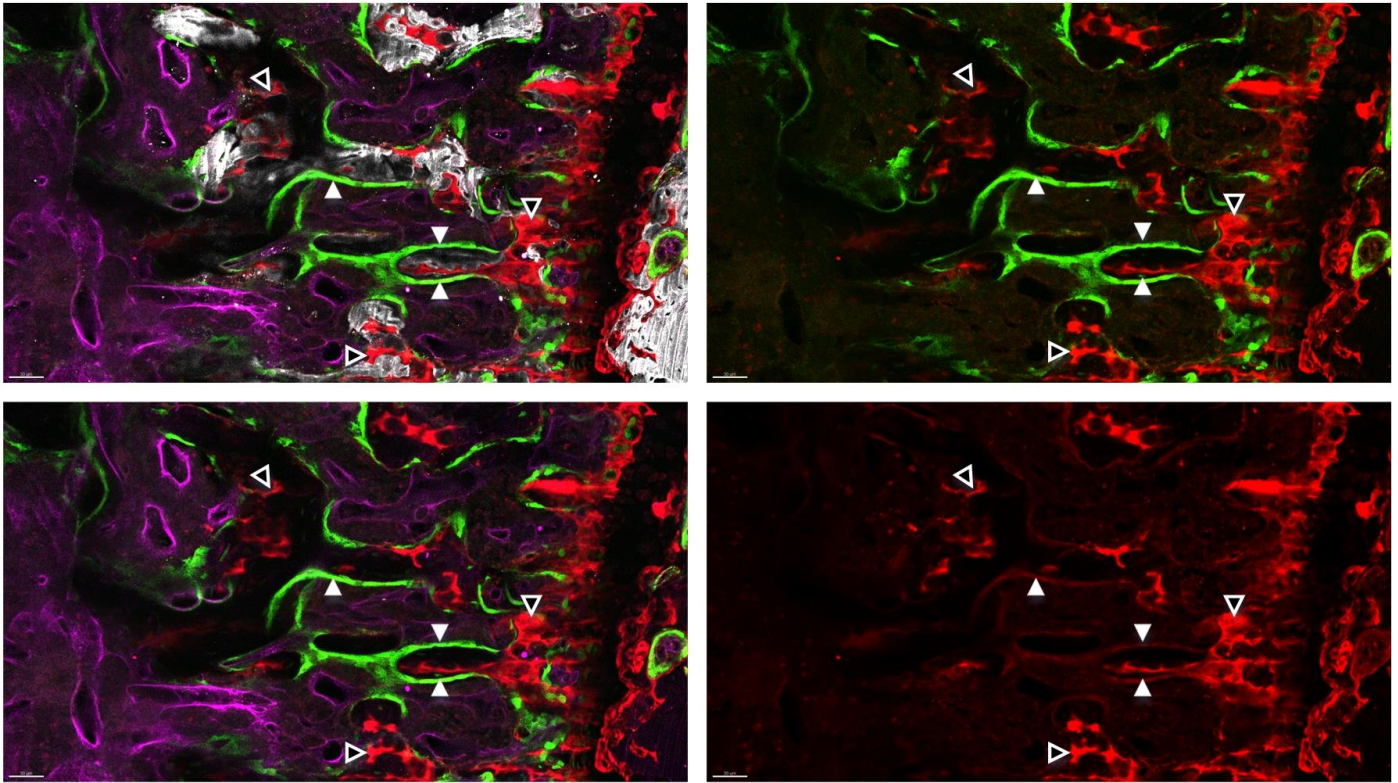

**Supplementary Figure 5**

Antibody staining for osteocalcin partially overlaps with OC-YFP expression.

Images show a zoom of data presented in Figure 2e and only four optical sections (total thickness 9.96 $\mu$ m). Near the distal growth plate of the femur, OC-YFP expressing cells (green, white arrowheads) line collagen 1+ (grey) trabecular bone surfaces and stain positive for osteocalcin antibody (red). Osteocalcin antibody also detects OC+ matrix away from YFP+ cells in trabecular bone and adjacent to the growth plate (black arrowheads). Scale bars: 30 $\mu$ m

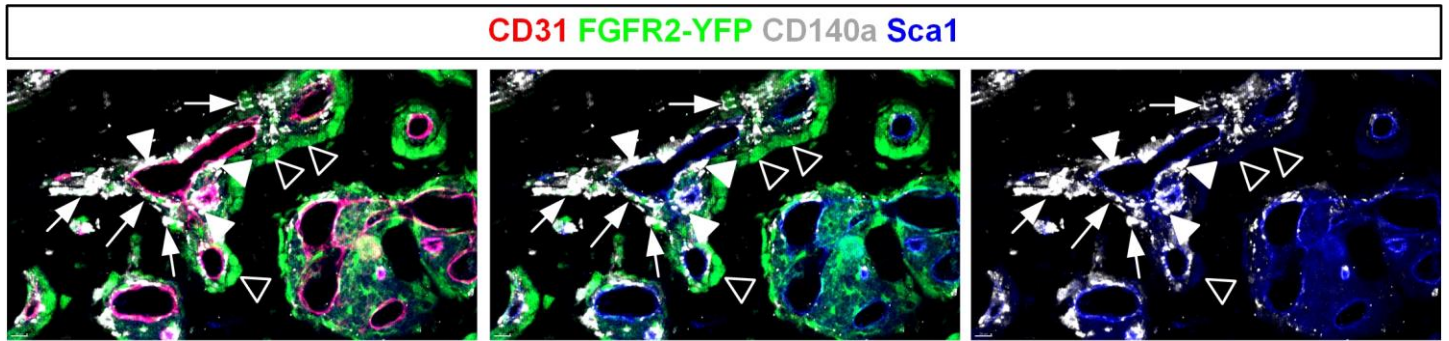

### Supplementary Figure 6

#### Expression of mesenchymal-progenitor-cell markers near the distal growth plate.

Images show a zoom of data presented in Figure 2f and only four optical sections (total thickness 9.96 $\mu$ m). We can observe CD140a+Sca1+ cells lining CD31+ blood vessels (white arrowheads), whereas bone lining cells are either FGFR2+ (black arrowheads) or FGFR2+CD140a+ (white arrows). Scale bars 20  $\mu$ m.



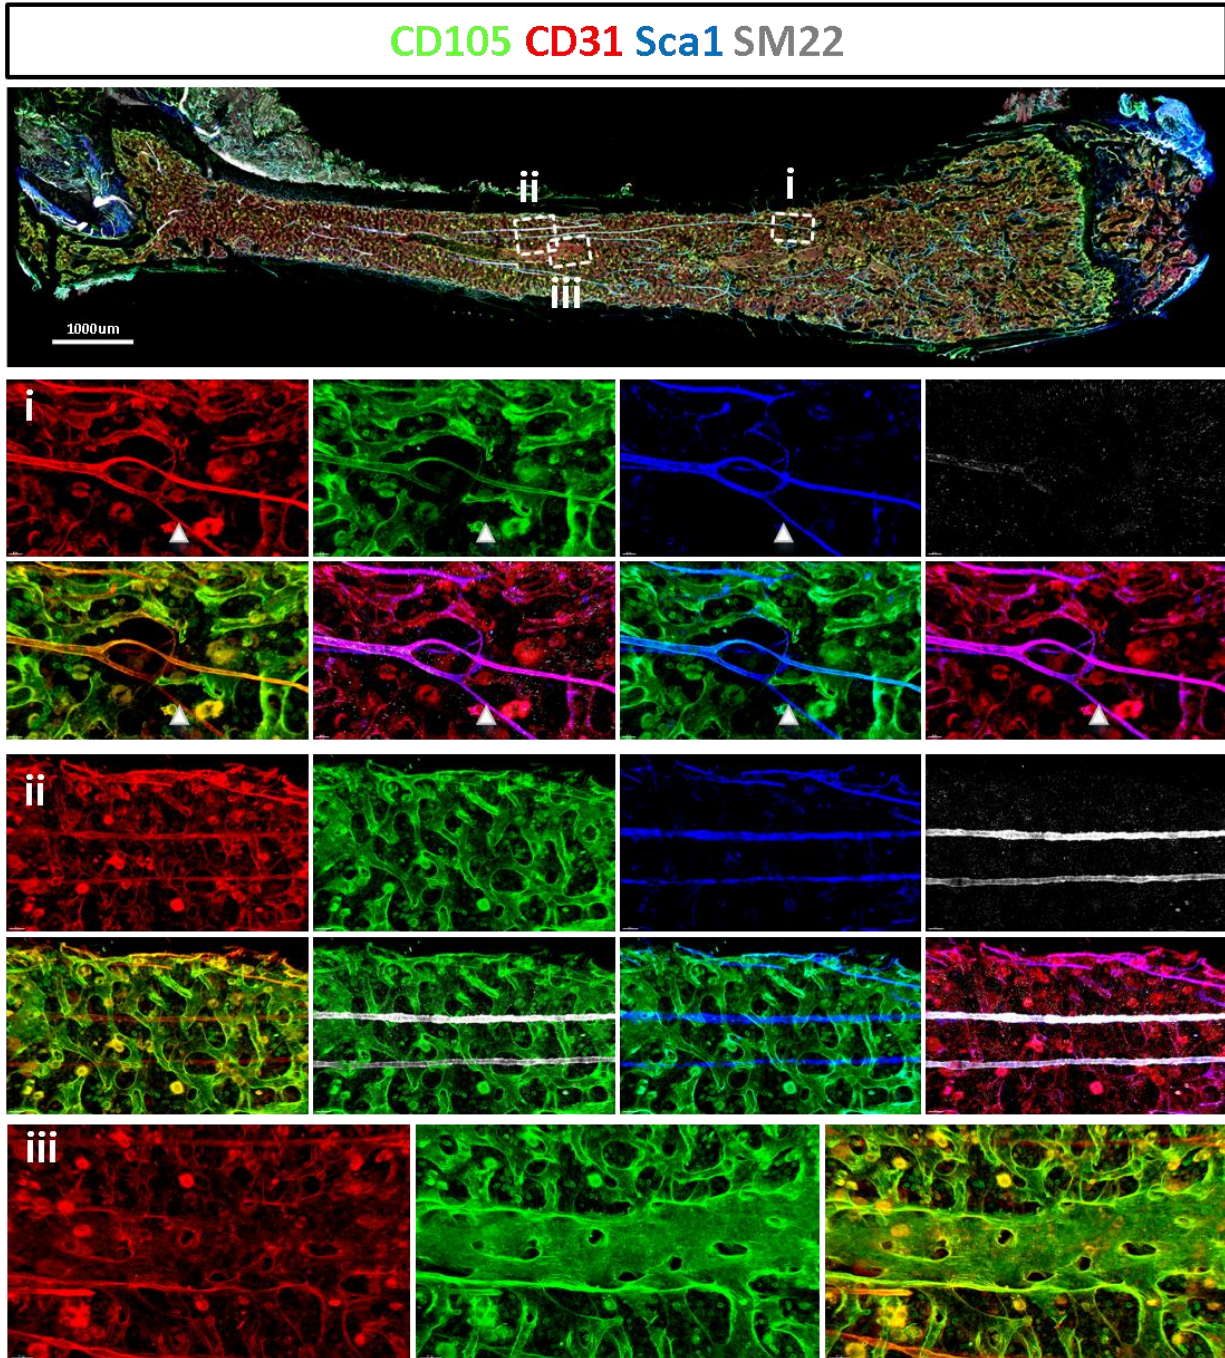

**Supplementary Figure 7**

CD105 is not a panendothelial marker.

(i) Most arterioles do not express CD105, but only CD31 and Sca1 (white arrowheads) potentially marking distinct arteriolar sub-types. (ii) Diaphyseal arteries marked by SM22 expression are CD105-CD31+Sca1+. (iii) Strong CD105 expression in the endothelial wall of the central sinus.

**Supplementary Table 1.** Antibodies tested and optimized in this study.

| Antibody                  | Alternative names                          | Clone       | Species | Company                   | Catalog number | Working | Requires streptavidin amplification |
|---------------------------|--------------------------------------------|-------------|---------|---------------------------|----------------|---------|-------------------------------------|
| Osteocalcin               | Ocn, bone Gla protein                      | poly        | goat    | AbD serotec               | 7060-1815      | Yes     | No                                  |
| CD271                     | p75 LNGF                                   | poly        | rabbit  | Abcam                     | ab8874         | Yes     | No                                  |
| c-Kit                     | CD117, SCF-R                               | poly        | goat    | R&D systems               | AF1356         | Yes     | No                                  |
|                           |                                            | ACK2        | rat     | eBioscience               | 14-1172-82     | Yes     | No                                  |
|                           |                                            | poly        | rabbit  | Novus Biologicals         | NBP1-19865     | No      | Not applicable                      |
| CD105                     | Endoglin                                   | MJ7/18      | rat     | eBioscience               | 14-1051-82     | Yes     | No                                  |
|                           |                                            | poly        | goat    | R&D systems               | AF1320         | Yes     | No                                  |
|                           |                                            | M-20        | goat    | Santa Cruz                | sc-19793       | No      | Not applicable                      |
| GFAP                      | Glial fibrillary acidic protein            | poly        | rabbit  | Thermo Scientific         | PA1-10019      | Yes     | No                                  |
|                           |                                            | poly        | chicken | Aves Labs                 | GFAP           | No      | Not applicable                      |
| CD44                      | hyaluronic acid receptor                   | IM7         | rat     | eBioscience               | 14-0441-82     | Yes     | No                                  |
| Alkaline phosphatase      | ALP                                        | poly        | goat    | R&D systems               | AF2910         | Yes     | No                                  |
|                           |                                            | EPR4477     | rabbit  | Novus Biologicals         | NBP1-95392     | Yes     | Yes                                 |
| Collagen 1                | Col.1                                      | poly        | rabbit  | Cedarlane                 | CL50151AP      | Yes     | No                                  |
| CD31                      | PECAM1                                     | poly        | goat    | R&D systems               | AF3628         | Yes     | No                                  |
|                           |                                            | ER-MP12     | rat     | Santa Cruz                | sc-52713       | No      | Not applicable                      |
|                           |                                            | poly        | rabbit  | Novus Biologicals         | NB100-2284     | No      | Not applicable                      |
|                           |                                            | SP38        | rabbit  | Thermo Scientific         | MA5-16337      | No      | Not applicable                      |
| NG2                       | chondroitin sulfate proteoglycan           | poly        | rabbit  | EMD Millipore             | AB5320         | Yes     | Yes                                 |
|                           |                                            | poly        | goat    | Novus Biologicals         | NBP-46332      | No      | Not applicable                      |
| CD73                      | NT5E, ecto-5'-nucleotidase                 | ebioTy/11.8 | rat     | eBioscience               | 14-0731-82     | Yes     | No                                  |
|                           |                                            | poly        | rabbit  | Thermo Scientific         | PA5-11871      | No      | Not applicable                      |
|                           |                                            | D7F9A       | rabbit  | Cell Signaling Technology | 13160          | No      | Not applicable                      |
| CD140a                    | PDGFRa                                     | poly        | rabbit  | Novus Biologicals         | NBP1-67666     | Yes     | Yes                                 |
|                           |                                            | 951         | rabbit  | Santa Cruz                | sc-431         | No      | Not applicable                      |
|                           |                                            | 958         | rabbit  | Santa Cruz                | sc-432         | No      | Not applicable                      |
| Sca1                      | Ly6A/E                                     | D7          | rat     | eBioscience               | 14-5981-85     | Yes     | No                                  |
|                           |                                            | 177228      | rat     | R&D systems               | MAB1226        | Yes     | No                                  |
|                           |                                            | poly        | goat    | R&D systems               | AF1226         | Yes     | No                                  |
|                           |                                            | M-86        | rabbit  | Santa Cruz                | sc-134474      | No      | Not applicable                      |
| SM22                      | alpha smooth muscle 22                     | poly        | rabbit  | Abcam                     | ab14106        | Yes     | Yes                                 |
| CD34                      | -                                          | RAM34       | rat     | eBioscience               | 16-0341-85     | Yes     | Yes                                 |
| vWF                       | von Willebrand Factor                      | poly        | rabbit  | Neomarkers                | RB-281-A       | Yes     | No                                  |
| Vcam1                     | CD116                                      | 429         | rat     | eBioscience               | 14-1061-82     | Yes     | No                                  |
|                           |                                            | H-276       | rabbit  | SantaCruz                 | sc-8304        | Yes     | No                                  |
|                           |                                            | 429         | rat     | Novus Biologicals         | NB100-77474    | Yes     | No                                  |
| Endomucin                 | -                                          | V.7C7       | rat     | Santa Cruz                | SC-65495       | Yes     | No                                  |
| CD90                      | Thy1                                       | poly        | sheep   | R&D systems               | AF2067         | Yes     | No                                  |
|                           |                                            | poly        | rabbit  | Thermo Scientific         | PA5-11917      | No      | Not applicable                      |
| Peripherin                | neurofilament 4                            | poly        | rabbit  | Biolegend/Covance         | PRB-576C       | Yes     | No                                  |
| Tyrosine Hydroxylase      | TH                                         | poly        | rabbit  | EMD Millipore             | AB152          | Yes     | No                                  |
| Neurofilament             | -                                          | poly        | rabbit  | Thermo Scientific         | PA3-16721      | Yes     | No                                  |
| Fibronectin               | -                                          | poly        | rabbit  | Abcam                     | ab-23750-100   | Yes     | No                                  |
| Laminin                   | LAMA1                                      | poly        | rabbit  | Novus Biologicals         | NB300-144      | Yes     | No                                  |
| Vitronectin               | -                                          | 347317      | rat     | R&D systems               | MAB38751       | Yes     | No                                  |
| Col.III                   | -                                          | poly        | goat    | Abcam                     | ab24823        | Yes     | No                                  |
| Col.IV                    | -                                          | poly        | rabbit  | ABDserotec                | 2150-1470      | No      | Not applicable                      |
|                           |                                            | poly        | rabbit  | Abcam                     | ab19808        | Yes     | No                                  |
| Osteopontin               | Opn                                        | poly        | goat    | R&D systems               | AF808          | Yes     | No                                  |
|                           | -                                          | poly        | rabbit  | Abcam                     | ab-63856-100   | No      | Not applicable                      |
| Perlecan                  | Endorepellin, Heparan Sulfate Proteoglycan | A7L6        | rat     | Novus Biologicals         | NB600-583      | Yes     | No                                  |
| Periostin                 | osteoblast-specific factor 2               | poly        | goat    | R&D systems               | AF2955         | Yes     | No                                  |
| LepR                      | Leptin receptor, CD295                     | poly        | goat    | R&D systems               | AF497          | Yes     | No                                  |
|                           |                                            | poly        | rabbit  | Life Span                 | LS-C385018     | No      | Not applicable                      |
|                           |                                            | poly        | rabbit  | Bioss                     | bs-0109R-A488  | No      | Not applicable                      |
| alpha-smooth muscle actin | aSMA                                       | poly        | rabbit  | Abcam                     | ab5694         | No      | Not applicable                      |
| beta-III tubulin          | -                                          | poly        | chicken | Aves Labs                 | TUJ            | No      | Not applicable                      |
|                           |                                            | poly        | rabbit  | Abcam                     | ab18207        | No      | Not applicable                      |
|                           |                                            | poly        | rabbit  | Thermo Scientific         | PA1-46430      | No      | Not applicable                      |
| VE cadherin               | CD144                                      | eBioBV13    | rat     | eBioscience               | 14-1441-82     | No      | Not applicable                      |
| GFP                       | -                                          | poly        | chicken | Aves Labs                 | GFP-1020       | Yes     | No                                  |
| nestin                    | -                                          | poly        | chicken | Aves Labs                 | NES            | No      | Not applicable                      |
|                           |                                            | poly G-20   | goat    | Santa Cruz                | sc-21248       | No      | Not applicable                      |
|                           |                                            | poly        | rabbit  | LifeSpan BioSciences      | LS-B656        | No      | Not applicable                      |
| S100 beta                 | -                                          | poly        | rabbit  | Abcam                     | ab14688        | No      | Not applicable                      |
| Doublecortin              | -                                          | poly        | rabbit  | Abcam                     | ab18723        | No      | Not applicable                      |
| MECA-32                   | Panendothelial Cell Antigen                | MECA-32     | rat     | Biolegend                 | 120501         | No      | Not applicable                      |



**Supplementary Table 2.** Details of the full bone scans available to the community.

| Figure & panel | Markers      | .lif file size (KB) | .ims file size (KB) | Total samples analyzed for each marker |
|----------------|--------------|---------------------|---------------------|----------------------------------------|
| Fig.2a         | OC-YFP       | 72 423 340          | 7 861 110           | 26                                     |
|                | CD44         |                     |                     | 3                                      |
|                | ALP          |                     |                     | 92                                     |
|                | Col.1        |                     |                     | 56                                     |
| Fig.2c         | Osx-GFP      | 60 397 117          | 4 884 944           | 14                                     |
|                | ALP          |                     |                     | 92                                     |
|                | CD105        |                     |                     | 163                                    |
|                | Col.1        |                     |                     | 56                                     |
| Fig.2d         | FGFR2-YFP    | 46 239 342          | 10 970 778          | 19                                     |
|                | NG2          |                     |                     | 11                                     |
|                | CD73         |                     |                     | 12                                     |
|                | CD31         |                     |                     | 218                                    |
| Fig.2e         | Col.1        | 61 955 683          | 9 560 231           | 56                                     |
|                | OC-YFP       |                     |                     | 26                                     |
|                | Oc(antibody) |                     |                     | 48                                     |
|                | CD105*       |                     |                     | 163                                    |
| Fig.2f         | FGFR2-YFP    | 18 967 505          | 1 487 583           | 19                                     |
|                | CD31         |                     |                     | 218                                    |
|                | CD140a       |                     |                     | 10                                     |
|                | Sca1         |                     |                     | 192                                    |
| Fig.3a         | CD105        | 78 325 924          | 6 331 948           | 163                                    |
|                | Sca1         |                     |                     | 192                                    |
|                | CD31         |                     |                     | 218                                    |
|                | SM22         |                     |                     | 27                                     |
| Fig.3b         | VCAM1        | 80 348 571          | 4 578 352           | 9                                      |
|                | CD31         |                     |                     | 218                                    |
|                | FGFR2-YFP*   |                     |                     | 19                                     |
|                | Laminin*     |                     |                     | 98                                     |
| Fig.3c         | Endomucin    | 59 522 632          | 17 348 505          | 16                                     |
|                | CD31         |                     |                     | 218                                    |
|                | Col.IV*      |                     |                     | 4                                      |
|                | Cxcl12-GFP*  |                     |                     | 53                                     |
| Fig.3d         | CD34         | 46 191 630          | 12 657 026          | 10                                     |
|                | CD31         |                     |                     | 218                                    |
|                | Col.1        |                     |                     | 56                                     |
| Fig.3e         | vWF          | 43 040 065          | 6 557 380           | 16                                     |
|                | Sca1         |                     |                     | 192                                    |
|                | CD31         |                     |                     | 218                                    |
| Fig.3f         | Nes-GFP      | 60 377 292          | 9 723 916           | 39                                     |
|                | Sca1         |                     |                     | 192                                    |
|                | CD90         |                     |                     | 22                                     |
|                | SM22**       |                     |                     | 27                                     |
| Fig.4a         | GFAP         | 80 808 235          | 15 239 660          | 107                                    |
|                | Sca1         |                     |                     | 192                                    |
|                | CD31         |                     |                     | 218                                    |
|                | TH           |                     |                     | 10                                     |
| Fig.4c         | NF           | 29 053 651          | 6 033 094           | 4                                      |
|                | Sca1         |                     |                     | 192                                    |
|                | CD31         |                     |                     | 218                                    |
| Fig.5a         | OC           | 35 748 863          | 2 749 095           | 48                                     |
|                | Fibronectin  |                     |                     | 11                                     |
| Fig.5b         | Laminin      | 54 379 213          | 9 507 438           | 98                                     |
|                | CD105        |                     |                     | 163                                    |
|                | OC*          |                     |                     | 48                                     |
| Fig.5c         | Cxcl12-GFP*  | 42 284 586          | 8 914 924           | 53                                     |
|                | Vitronectin  |                     |                     | 8                                      |
|                | Col.III      |                     |                     | 4                                      |
|                | Fn           |                     |                     | 11                                     |
| Fig.5d         | Col.IV       | 59 522 632          | 17 348 505          | 4                                      |
|                | CD31         |                     |                     | 218                                    |
|                | Cxcl12-GFP*  |                     |                     | 53                                     |
|                | Endomucin*   |                     |                     | 16                                     |
| Fig.5e         | Cxcl12-GFP   | 44 026 791          | 11 079 527          | 53                                     |
|                | CD105        |                     |                     | 163                                    |
|                | Col.1        |                     |                     | 56                                     |
|                | OPN          |                     |                     | 9                                      |
| Fig.5f         | Perlecan     | 38 946 822          | 8 446 520           | 3                                      |
|                | Periostin    |                     |                     | 3                                      |
|                | Col.I*       |                     |                     | 56                                     |
| Fig.6a         | Nes-GFP      | 64 783 309          | 7 197 368           | 39                                     |
|                | CD271        |                     |                     | 35                                     |
|                | ALP          |                     |                     | 92                                     |
|                | VCAM1**      |                     |                     | 9                                      |
| Fig.6b         | FGFR2-YFP    | 80 348 571          | 4 579 352           | 19                                     |
|                | CD31         |                     |                     | 218                                    |
|                | Laminin*     |                     |                     | 98                                     |
|                | VCAM1*       |                     |                     | 9                                      |
| Fig.6c         | BODIPY       | 55 136 504          | 20 341 492          | 4                                      |
|                | CD31         |                     |                     | 218                                    |
|                | B220*        |                     |                     | 77                                     |
|                | DAPI*        |                     |                     | -                                      |
| Fig.6d         | Cxcl12-GFP   | 50 798 977          | 13 231 698          | 53                                     |
|                | LepR         |                     |                     | 20                                     |
|                | Col.1        |                     |                     | 56                                     |
|                | CD105        |                     |                     | 163                                    |

\*: Not shown in article; \*\*: immunostaining not working

**Supplementary Table 3.** Location of stromal cell markers in adult mouse femurs and expression in cellular subtypes.

| Marker                 | Epiphysis | Metaphysis | Diaphysis | Stroma | Osteoblasts/<br>osteocytes   | Periarteriolar                    | Perisinusoidal | Endothelium    | Adipocytes |
|------------------------|-----------|------------|-----------|--------|------------------------------|-----------------------------------|----------------|----------------|------------|
| <b>CD271</b>           | Low       | Low        | High      | Yes    | No                           | No                                | No             | No             | No         |
| <b>FGFR2</b>           | Low       | High       | Low       | Yes    | Yes                          | No                                | Yes            | No             | Yes        |
| <b>Bopidy</b>          | High      | High       | Low       | No     | No                           | No                                | No             | No             | Yes        |
| <b>Cxcl12-GFP</b>      | High      | High       | High      | Yes    | No                           | Yes                               | Yes            | No             | No         |
| <b>LepR</b>            | High      | High       | High      | Yes    | No                           | No                                | Yes            | Yes            | No         |
| <b>ALP</b>             | Low       | High       | Low       | Yes    | Osteoblasts                  | No                                | No             | No             | No         |
| <b>Nestin-GFP</b>      | Low       | High       | Medium    | No     | Osteoblasts                  | Yes, enriched<br>in metaphysis    | No             | Yes            | No         |
| <b>CD105</b>           | High      | High       | High      | No     | No                           | No                                | No             | Sinusoids only | No         |
| <b>CD73</b>            | Low       | Low        | No        | No     | Chondrocytes                 | No                                | No             | No             | No         |
| <b>Osteocalcin-YFP</b> | Low       | High       | Low       | No     | Osteoblasts                  | No                                | No             | No             | No         |
| <b>CD140a</b>          | Low       | Medium     | Low       | No     | Osteoblasts                  | Yes, enriched<br>in metaphysis    | No             | No             | No         |
| <b>Sca1</b>            | Low       | Medium     | High      | No     | Putative pre-<br>osteoblasts | Yes,<br>throughout<br>bone marrow | No             | Low            | No         |
| <b>CD90</b>            | Low       | High       | Medium    | No     | Putative pre-<br>osteoblasts | Yes, enriched<br>in metaphysis    | No             | No             | No         |
| <b>Osterix-GFP</b>     | Low       | High       | Low       | No     | Osteoblasts                  | No                                | No             | No             | No         |
